# Supplementary material for: Neuroanatomical correlates of aggressiveness: a case–control voxel- and surface-based morphometric study
Source: Springer Nature journal article supplement (doi:10.1007/s00429-023-02715-x), 2023-10-11
Supplement: MOESM1 [file 26151628]

Title: **Brain structure of martial artists. A case-control voxel- and surface-based morphometric study**

Journal: Brain Structure and Function

Author names: Stephanie Seidenbecher, Maria Schöne, Jörn Kaufmann, Kolja Schiltz, Bernhard Bogerts, & Thomas Frodl

Corresponding author: Stephanie Seidenbecher; Department of Psychiatry and Psychotherapy, Otto von Guericke University Magdeburg, Magdeburg, Germany;

Stephanie.Seidenbecher@med.ovgu.de

**Table SI 1** Detailed information on psychiatric symptoms (five subscales of the BPRS), psychopathic traits (eight subscales of the PPI-R) and early childhood traumata (five subscales of the CTQ) in martial artists compared to controls.

|                                    | Martial artists ( <i>n</i> = 29)                           | Controls ( <i>n</i> = 32)                                  | Statistics                                            |
|------------------------------------|------------------------------------------------------------|------------------------------------------------------------|-------------------------------------------------------|
| <b>Psychiatric symptoms (BPRS)</b> |                                                            |                                                            |                                                       |
| - Anxiety/depression               | <i>Mdn</i> = 1.00 ( <i>Q1</i> = 1.00, <i>Q3</i> = 1.00)    | <i>Mdn</i> = 1.00 ( <i>Q1</i> = 1.00, <i>Q3</i> = 1.25)    | <i>U</i> = 390.50, <i>Z</i> = -1.35, <i>p</i> = .178  |
| - Anergia                          | <i>Mdn</i> = 1.00 ( <i>Q1</i> = 1.00, <i>Q3</i> = 1.13)    | <i>Mdn</i> = 1.00 ( <i>Q1</i> = 1.00, <i>Q3</i> = 1.00)    | <i>U</i> = 436.50, <i>Z</i> = -.55, <i>p</i> = .579   |
| - Thought disorder                 | <i>Mdn</i> = 1.00 ( <i>Q1</i> = 1.00, <i>Q3</i> = 1.00)    | <i>Mdn</i> = 1.00 ( <i>Q1</i> = 1.00, <i>Q3</i> = 1.00)    | <i>U</i> = 443.50, <i>Z</i> = -.43, <i>p</i> = .669   |
| - Activation                       | <i>Mdn</i> = 1.00 ( <i>Q1</i> = 1.00, <i>Q3</i> = 1.00)    | <i>Mdn</i> = 1.00 ( <i>Q1</i> = 1.00, <i>Q3</i> = 1.25)    | <i>U</i> = 378.00, <i>Z</i> = -1.93, <i>p</i> = .053  |
| - Hostility/mistrust               | <i>Mdn</i> = 1.00 ( <i>Q1</i> = 1.00, <i>Q3</i> = 1.00)    | <i>Mdn</i> = 1.00 ( <i>Q1</i> = 1.00, <i>Q3</i> = 1.00)    | <i>U</i> = 452.00, <i>Z</i> = -.46, <i>p</i> = .644   |
| <b>Psychopathy (PPI-R)</b>         |                                                            |                                                            |                                                       |
| - Debt externalization             | <i>Mdn</i> = 22.00 ( <i>Q1</i> = 19.50, <i>Q3</i> = 27.50) | <i>Mdn</i> = 24.50 ( <i>Q1</i> = 19.25, <i>Q3</i> = 30.25) | <i>U</i> = 415.50, <i>Z</i> = -.70, <i>p</i> = .483   |
| - Rebellious risk-taking           | <i>Mdn</i> = 57.00 ( <i>Q1</i> = 52.00, <i>Q3</i> = 64.50) | <i>Mdn</i> = 52.00 ( <i>Q1</i> = 42.25, <i>Q3</i> = 59.75) | <i>U</i> = 317.00, <i>Z</i> = -2.13, <i>p</i> = .034* |
| - Stressimmunity                   | <i>Mdn</i> = 50.00 ( <i>Q1</i> = 43.00, <i>Q3</i> = 53.50) | <i>Mdn</i> = 45.00 ( <i>Q1</i> = 41.25, <i>Q3</i> = 48.00) | <i>U</i> = 339.00, <i>Z</i> = -1.82, <i>p</i> = .068  |
| - Social influence                 | <i>Mdn</i> = 46.00 ( <i>Q1</i> = 42.00, <i>Q3</i> = 50.50) | <i>Mdn</i> = 43.00 ( <i>Q1</i> = 39.25, <i>Q3</i> = 49.75) | <i>U</i> = 392.50, <i>Z</i> = -1.03, <i>p</i> = .301  |
| - Coldheartedness                  | <i>Mdn</i> = 33.00 ( <i>Q1</i> = 30.00, <i>Q3</i> = 38.00) | <i>Mdn</i> = 32.50 ( <i>Q1</i> = 28.25, <i>Q3</i> = 39.25) | <i>U</i> = 453.50, <i>Z</i> = -.15, <i>p</i> = .879   |
| - Machiavellian Egoism             | <i>Mdn</i> = 36.00 ( <i>Q1</i> = 31.00, <i>Q3</i> = 39.00) | <i>Mdn</i> = 36.00 ( <i>Q1</i> = 33.00, <i>Q3</i> = 38.00) | <i>U</i> = 422.00, <i>Z</i> = -.61, <i>p</i> = .543   |
| - Careless planlessness            | <i>Mdn</i> = 30.00 ( <i>Q1</i> = 25.50, <i>Q3</i> = 33.50) | <i>Mdn</i> = 27.00 ( <i>Q1</i> = 26.00, <i>Q3</i> = 32.75) | <i>U</i> = 416.50, <i>Z</i> = -.69, <i>p</i> = .492   |
| - Fearlessness                     | <i>Mdn</i> = 20.00 ( <i>Q1</i> = 18.50, <i>Q3</i> = 23.50) | <i>Mdn</i> = 20.00 ( <i>Q1</i> = 14.25, <i>Q3</i> = 22.00) | <i>U</i> = 368.00, <i>Z</i> = -1.39, <i>p</i> = .164  |
| <b>Childhood Trauma (CTQ)</b>      |                                                            |                                                            |                                                       |
| - Emotional abuse                  | <i>Mdn</i> = 5.00 ( <i>Q1</i> = 5.00, <i>Q3</i> = 7.00)    | <i>Mdn</i> = 6.50 ( <i>Q1</i> = 5.00, <i>Q3</i> = 7.75)    | <i>U</i> = 382.00, <i>Z</i> = -1.26, <i>p</i> = .208  |
| - Physical mistreatment            | <i>Mdn</i> = 5.00 ( <i>Q1</i> = 5.00, <i>Q3</i> = 6.50)    | <i>Mdn</i> = 5.00 ( <i>Q1</i> = 5.00, <i>Q3</i> = 5.00)    | <i>U</i> = 376.00, <i>Z</i> = -1.78, <i>p</i> = .076  |
| - Sexual abuse                     | <i>Mdn</i> = 5.00 ( <i>Q1</i> = 5.00, <i>Q3</i> = 5.00)    | <i>Mdn</i> = 5.00 ( <i>Q1</i> = 5.00, <i>Q3</i> = 5.00)    | <i>U</i> = 432.00, <i>Z</i> = -1.50, <i>p</i> = .134  |
| - Emotional neglect                | <i>Mdn</i> = 8.00 ( <i>Q1</i> = 5.00, <i>Q3</i> = 12.00)   | <i>Mdn</i> = 10.00 ( <i>Q1</i> = 6.25, <i>Q3</i> = 13.00)  | <i>U</i> = 355.50, <i>Z</i> = -1.58, <i>p</i> = .113  |
| - Physical neglect                 | <i>Mdn</i> = 5.00 ( <i>Q1</i> = 5.00, <i>Q3</i> = 7.00)    | <i>Mdn</i> = 5.00 ( <i>Q1</i> = 5.00, <i>Q3</i> = 7.00)    | <i>U</i> = 440.50, <i>Z</i> = -.37, <i>p</i> = .710   |

*Abbreviations.* BPRS = Brief Psychiatric Rating Scale (CIPS 1977); CTQ = Childhood Trauma Questionnaire (Bernstein et al. 2003); PPI-R = Psychopathic Personality Inventory-Revised (Alpers and Eisenbarth 2008).
