# Supplementary material for: Neuroanatomical correlates of aggressiveness: a case–control voxel- and surface-based morphometric study
Source: Springer Nature journal article supplement (doi:10.1007/s00429-023-02715-x), 2023-10-11
Supplement: MOESM2 [file 26151628]

Title: **Brain structure of martial artists. A case-control voxel- and surface-based morphometric study**

Journal: Brain Structure and Function

Author names: Stephanie Seidenbecher, Maria Schöne, Jörn Kaufmann, Kolja Schiltz, Bernhard Bogerts, & Thomas Frodl

Corresponding author: Stephanie Seidenbecher; Department of Psychiatry and Psychotherapy, Otto von Guericke University Magdeburg, Magdeburg, Germany;

Stephanie.Seidenbecher@med.ovgu.de

**Table SI 2** Morphological brain characteristics of martial artists compared to controls.

|                                           | Martial artists ( $n = 29$ )                     | Controls ( $n = 32$ )                            | Statistics                              |
|-------------------------------------------|--------------------------------------------------|--------------------------------------------------|-----------------------------------------|
| Brain volume estimates [cm <sup>3</sup> ] |                                                  |                                                  |                                         |
| - CSF                                     | $Mdn = 260.00$ ( $Q1 = 235.50$ , $Q3 = 304.00$ ) | $Mdn = 286.00$ ( $Q1 = 250.50$ , $Q3 = 325.75$ ) | $U = 343.50$ , $Z = -1.74$ , $p = .082$ |
| - GM                                      | $M = 732.59 \pm 58.11$                           | $M = 710.19 \pm 54.92$                           | $T(59) = 1.55$ , $p = .127$             |
| - WM                                      | $M = 568.34 \pm 54.78$                           | $M = 567.92 \pm 44.08$                           | $T(59) = .05$ , $p = .963$              |
| - TIV                                     | $M = 1576.72 \pm 112.40$                         | $M = 1573.06 \pm 103.81$                         | $T(59) = .13$ , $p = .895$              |
| Mean thickness [mm]                       | $M = 2.74 \pm .11$                               | $M = 2.75 \pm .09$                               | $T(59) = -.43$ , $p = .668$             |
| Image and Preprocessing<br>Quality        |                                                  |                                                  |                                         |
| - IQR [%]                                 | $Mdn = 86.50$ ( $Q1 = 86.44$ , $Q3 = 86.53$ )    | $Mdn = 86.47$ ( $Q1 = 86.37$ , $Q3 = 86.51$ )    | $U = 343.00$ , $Z = -1.75$ , $p = .080$ |

*Abbreviations.* CSF = Cerebrospinal fluid; GM = Gray matter; IQR = Image quality rating (weighted average); TIV = Total intracranial volume; WM = White matter.
